# Supplementary material for: A tris(2,2′-bipyridine)ruthenium(ii) derivative tethered to a cis-PtCl2(amine)2moiety: syntheses, spectroscopic properties, and visible-light-induced scission of DNA
Source: Royal Society of Chemistry journal article supplement (doi:10.1039/b600165c), 2006-01-01
Supplement: b600165c1.pdf [file b600165c1.pdf]

## Supporting Information

### A Tris(2,2'-bipyridine)ruthenium(II) Derivative Tethered to a *cis*-PtCl<sub>2</sub>(amine)<sub>2</sub> Moiety: Syntheses, Spectroscopic Properties, and Visible-Light-Induced Scission of DNA

Ken Sakai,<sup>a,\*</sup> Hironobu Ozawa,<sup>a</sup> Hajime Yamada,<sup>b</sup> Taro Tsubomura,<sup>b</sup> Mariko Hara,<sup>b</sup> Akon Higuchi,<sup>b</sup> Masa-aki Haga<sup>c</sup>

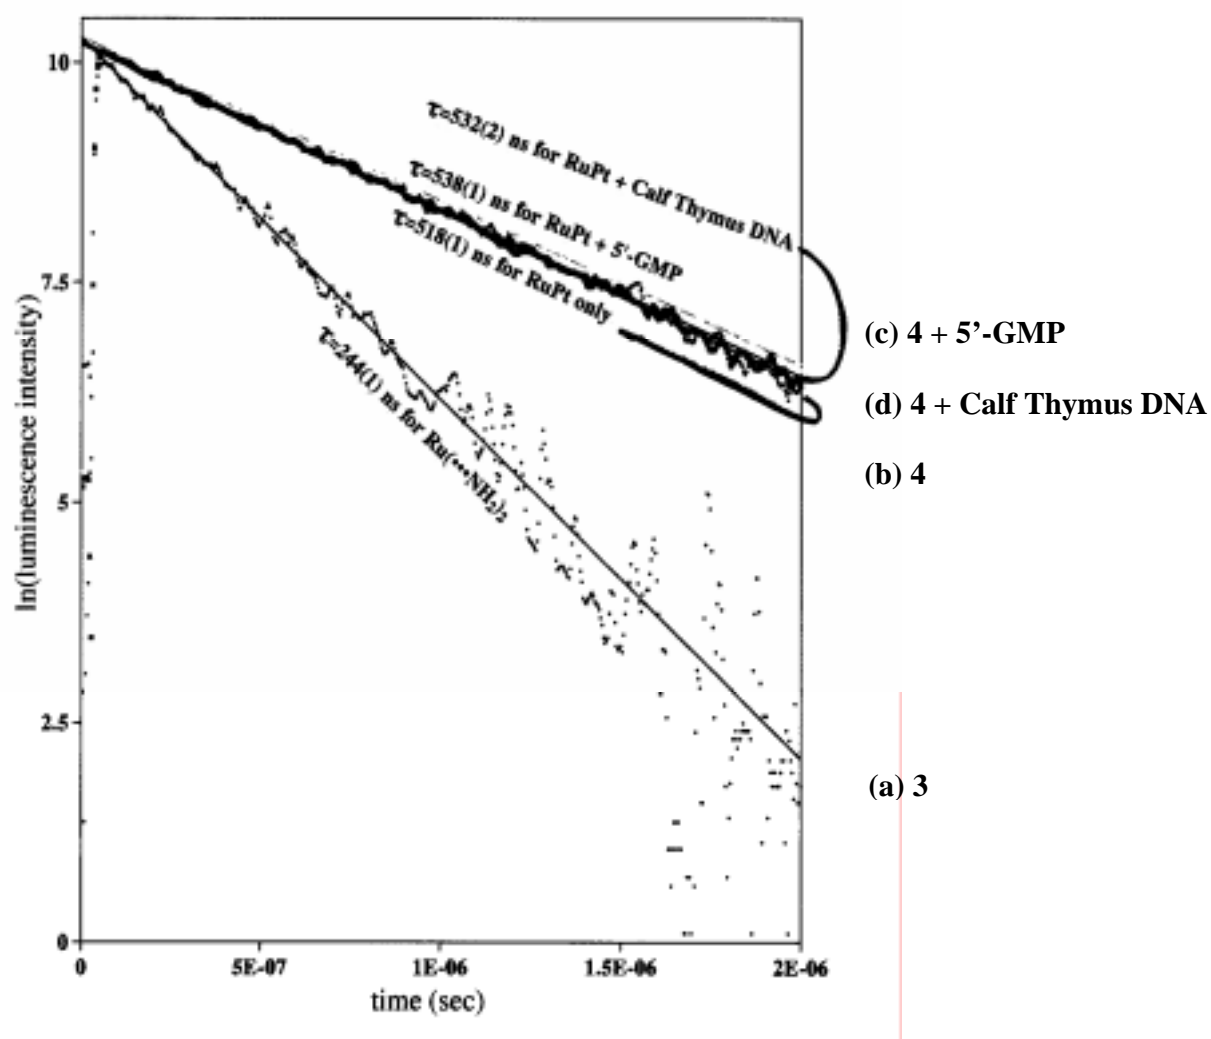

**Figure S1.** Luminescence decays observed for aqueous solutions of (a) **3**, (b) **4**, (c) **4** and 5'-GMP, (d) **4** and Calf Thymus DNA in air at room temperature. Experimental conditions are same to those given in Figures 3 and 4 reported in the main text.
