# Supplementary material for: A tris(2,2′-bipyridine)ruthenium(ii) derivative tethered to a cis-PtCl2(amine)2moiety: syntheses, spectroscopic properties, and visible-light-induced scission of DNA
Source: Royal Society of Chemistry journal article supplement (doi:10.1039/b600165c), 2006-01-01
Supplement: b600165c2.pdf [file b600165c2.pdf]

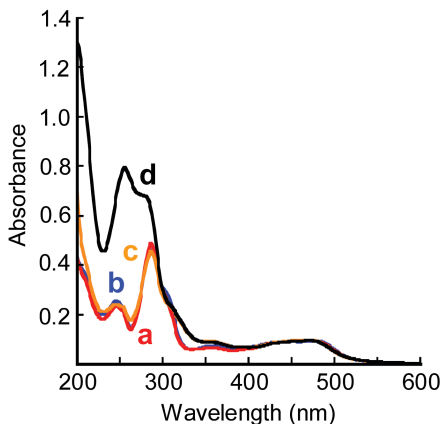

**Fig. 3.** Absorption spectra in water (in air, at 20 °C) of **2-4** (a-c), and **4** in the presence Calf Thymus DNA (d), where the complex concentrations were adjusted at  $8 \times 10^{-5}$  M and the DNA concentration was  $9 \times 10^{-5}$  M.

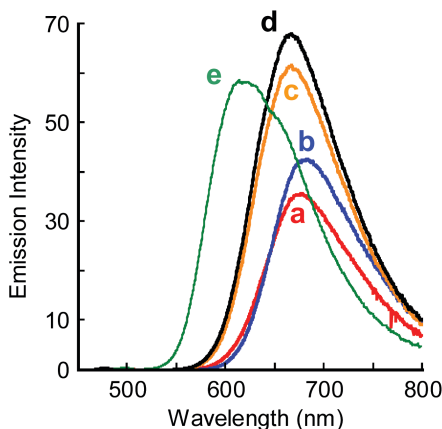

**Fig. 4.** Luminescence spectra in water (in air, at 20 °C) of **2-4** (a-c), **4** in the presence Calf Thymus DNA (d), and  $[\text{Ru}(\text{bpy})_3]\text{Cl}_2 \cdot 6\text{H}_2\text{O}$  (e), where the complex concentrations were adjusted at  $8 \times 10^{-5}$  M, the DNA concentration was  $9 \times 10^{-5}$  M, excitation was carried out at  $425 \pm 2.5$  nm, and all the solutions had the same absorbance at 425 nm ( $\text{Abs}_{425} = 0.1$ ).
